# Supplementary material
Source: Springer Nature journal article supplement (https://www.springermedizin.de/resource/supplementary/12885_2014_4810_MOESM11_ESM.pdf/9467350)
Supplement: MOESM11 [file 9467350]

**A**

Healthy soft tissue

Basement membrane

Endothelial cells

Tie2

**B**

Ionizing radiation

Tissue damage

Inflammation

Wound healing

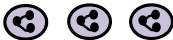

↑ Neutrophil presence

↓ Angiogenic capacity

↑ Cell death

Cytokine production  
(↑MIP-2, ↑IL-6)

↑ Erythema

**C**

Ionizing radiation + VT

↓ Tissue damage

↓ Inflammation

↑ Wound healing

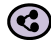

↓ Neutrophil presence

↑ Angiogenic capacity

↓ Cell death

Altered cytokine production  
(↓MIP-2, ↑↑IL-6?)

↓ Erythema
